# Supplementary material
Source: PubMed Central journal article supplement (PMC3960539)
Supplement: ismej2013197x3.pdf [file ismej2013197x3.pdf]

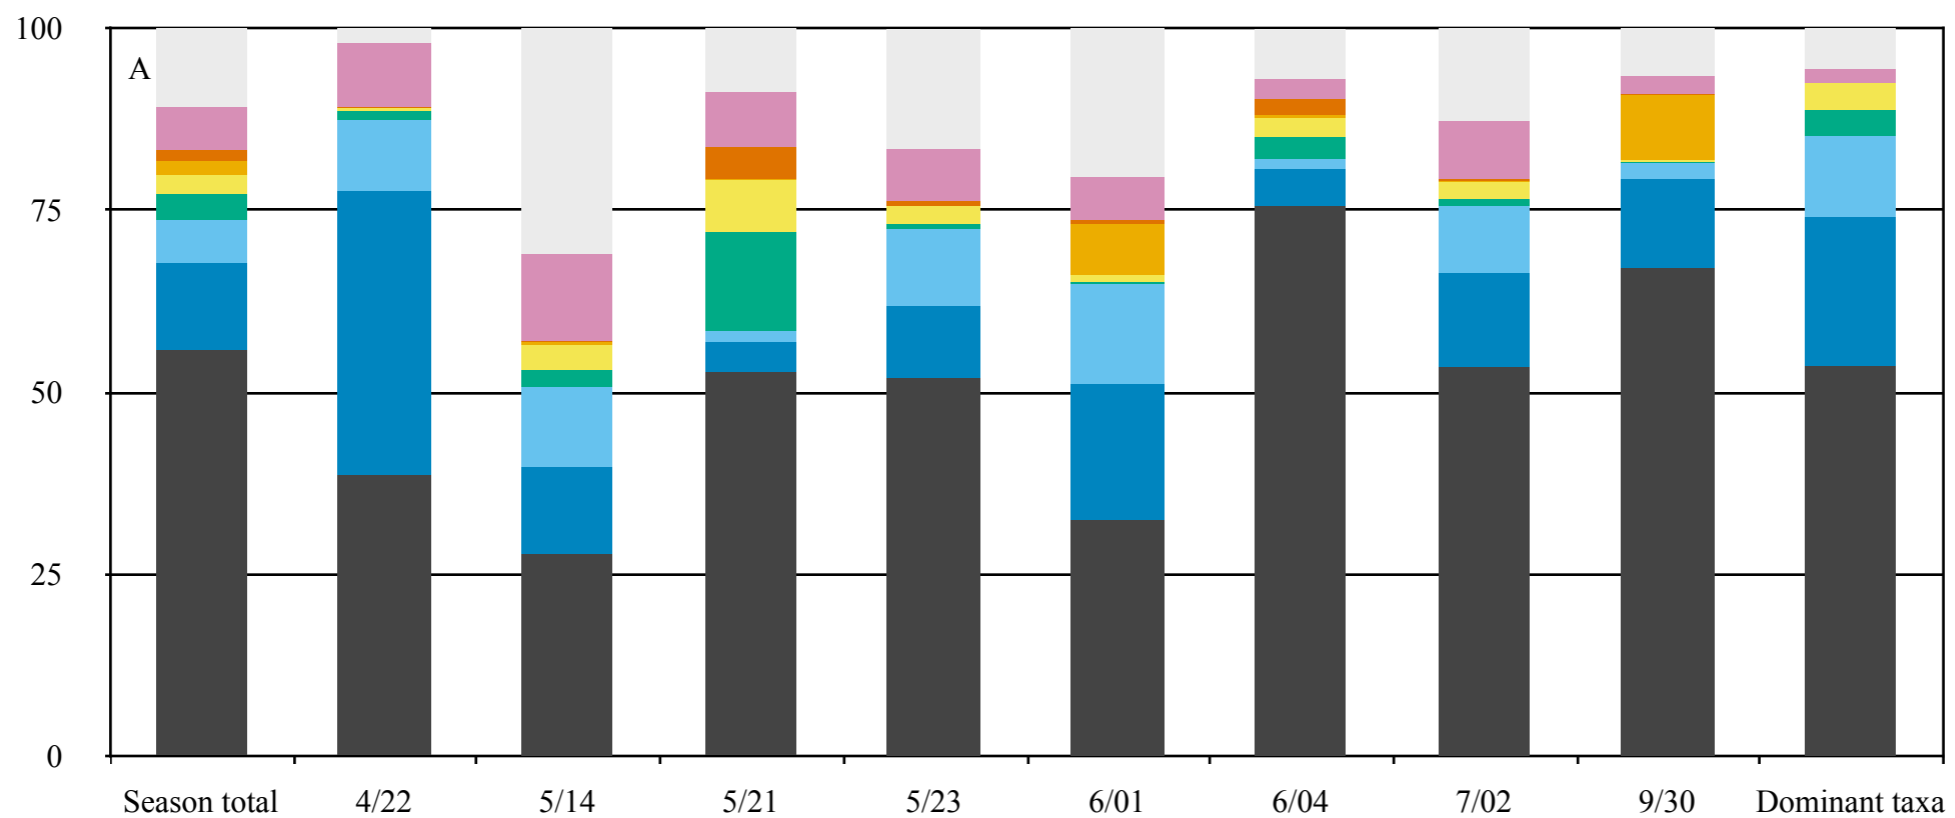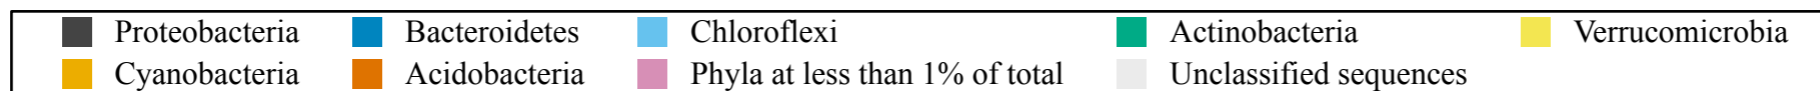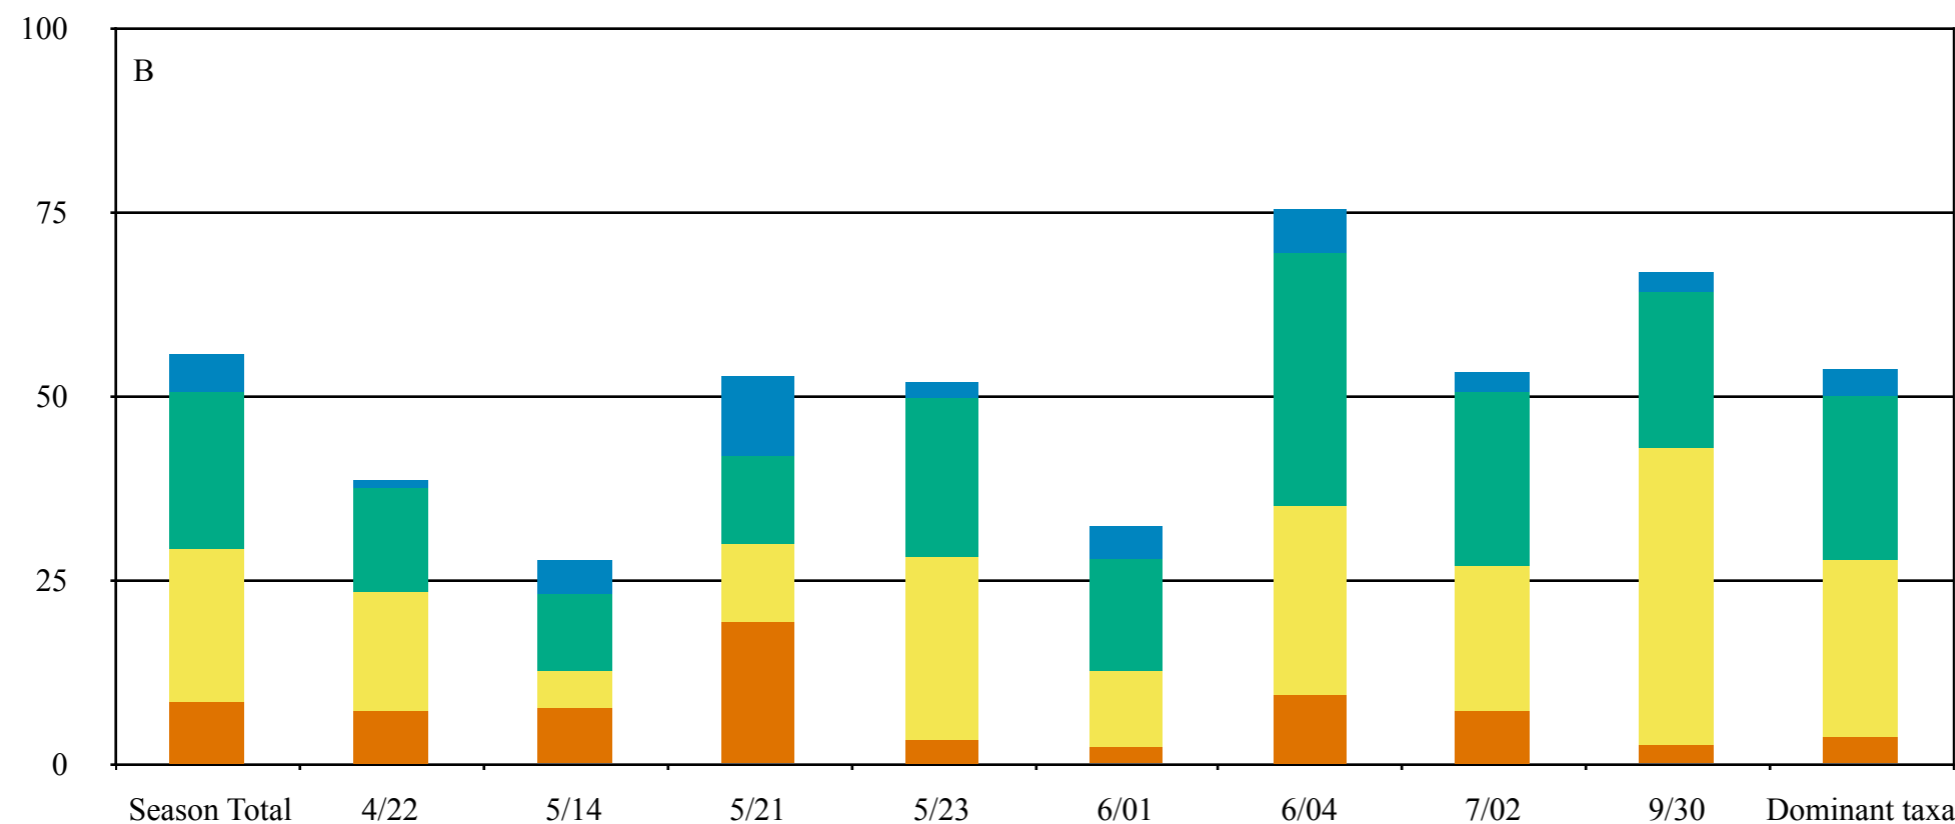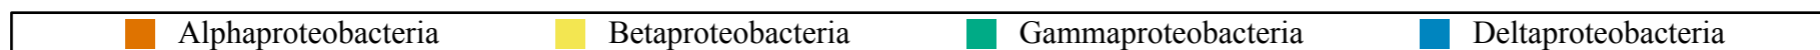

Supplemental Figure 3. Stacked bar chart of the classification of the percent total sequences from the tagged-pyrosequencing library for the entire season of (A) phyla and (B) Protoeobacteria, from each sampling date (4/22 - 9/30), Route 215 (Rt 215) and unique dominant sequences (present in  $\geq 3$  samples). Sequences with less than 25% identity to reference phyla were grouped with unclassified sequences and taxa at less than 1% of seasonal totals were grouped in the phyla at less than 1% of totals.
