# Supplementary material
Source: PubMed Central journal article supplement (PMC3960539)
Supplement: ismej2013197x7.pdf [file ismej2013197x7.pdf]

Supplemental Table 1. Tagged-pyrosequencing sample IDs, Barcodes and Primer sequences

| <b>Sample ID</b> | <b>Barcode Sequence</b> | <b>Linker Primer Sequence</b> |
|------------------|-------------------------|-------------------------------|
| LD 4-22-10       | TGTGACGTAC              | GTGCCAGCMGCNGCGG              |
| LD 5-14-10       | TGTGCATCAC              | GTGCCAGCMGCNGCGG              |
| LD 5-21-10       | GAGTTTGATC              | GTGCCAGCMGCNGCGG              |
| LD 5-23-10       | TGTACCAACT              | GTGCCAGCMGCNGCGG              |
| LD 6-1-10        | TGTACCTATC              | GTGCCAGCMGCNGCGG              |
| LD 6-4-10        | GAGTTTGATC              | GTGCCAGCMGCNGCGG              |
| LD 7-2-10        | AAAAGTGGGC              | GTGCCAGCMGCNGCGG              |
| LD 9-30-10       | AAACGGCCGT              | GTGCCAGCMGCNGCGG              |
