# Supplementary material
Source: PubMed Central journal article supplement (PMC3960539)

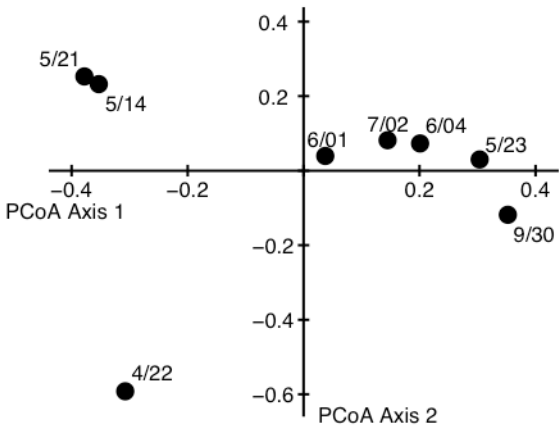

Supplement: ismej2013197x5.pdf [file ismej2013197x5.pdf]
